# Supplementary material for: Germline mutation analyses of malignant ground glass opacity nodules in non-smoking lung adenocarcinoma patients
Source: PeerJ journal article supplement (doi:10.7717/peerj.12048), 2021-08-31

All patients were closely followed from the past 6 months to 3 years. The size of the GGO nodules either increased or the nodule density increased or the solid components of nodules increased. All patients expressed their strong will to have a surgery. Surgery is the result of comprehensive considerations from the clinical point. All the process strictly follows the guidelines for the clinical diagnosis and treatment of lung cancer.

| Patient ID | Pathology                        | Tumour size<br>(cm) | Tumour location  |
|------------|----------------------------------|---------------------|------------------|
| WL-1       | LUAD†, invasive                  | 1.2                 | right upper lobe |
| WL-2       | LUAD†, AIS*                      | 0.6                 | left upper lobe  |
| WL-3       | Atypical adenomatous hyperplasia | 0.5                 | right upper lobe |
| WL-4       | LUAD†, invasive                  | 1.5                 | left upper lobe  |
| WL-5       | LUAD†, minimally invasive        | 1.0                 | right upper lobe |
| WL-6       | LUAD†, minimally invasive        | 0.6                 | left upper lobe  |
| WL-7       | LUAD†, invasive                  | 2.0                 | right upper lobe |
| WL-8       | LUAD†, invasive                  | 2.0                 | right lower lobe |
| WL-9       | LUAD†, AIS*                      | 0.8                 | right upper lobe |
| WL-10      | LUAD†, AIS*                      | 0.7                 | right upper lobe |
| WL-11      | LUAD†, AIS*                      | 0.6                 | right lower lobe |
| WL-12      | LUAD†, AIS*                      | 0.8                 | right upper lobe |
| WL-13      | LUAD†, minimally invasive        | 0.7                 | right lower lobe |

† lung adenocarcinoma; \* adenocarcinoma in situ; \*\*ground glass opacity;

WL-1 CT (left) and IHC (right)

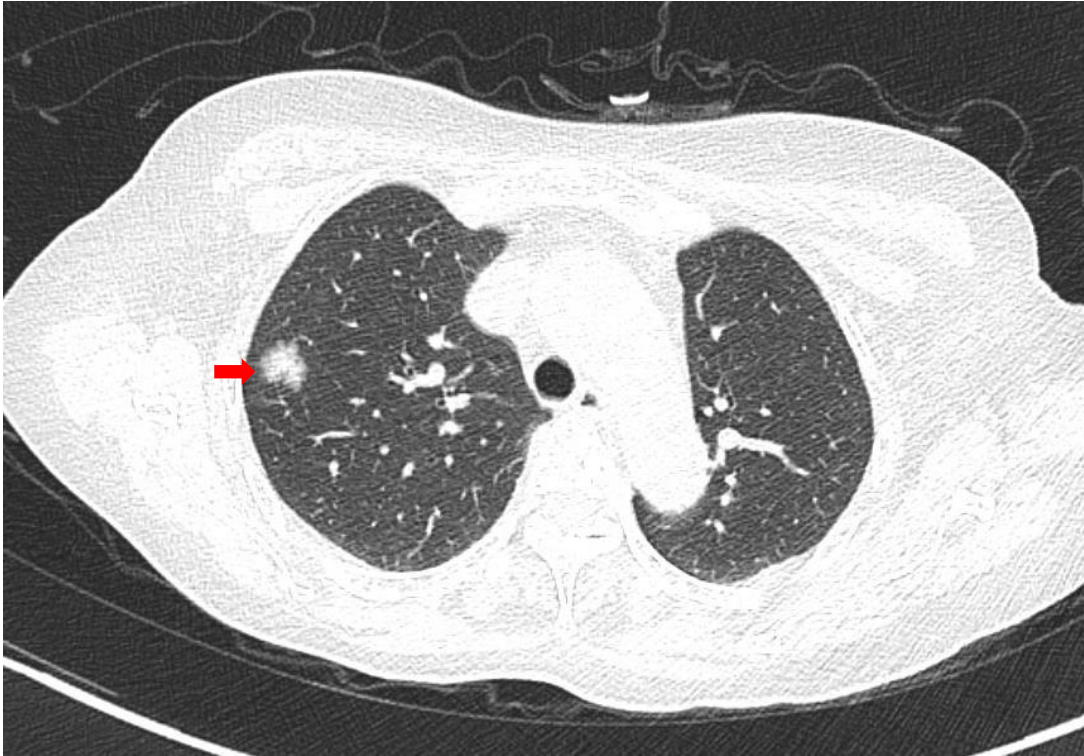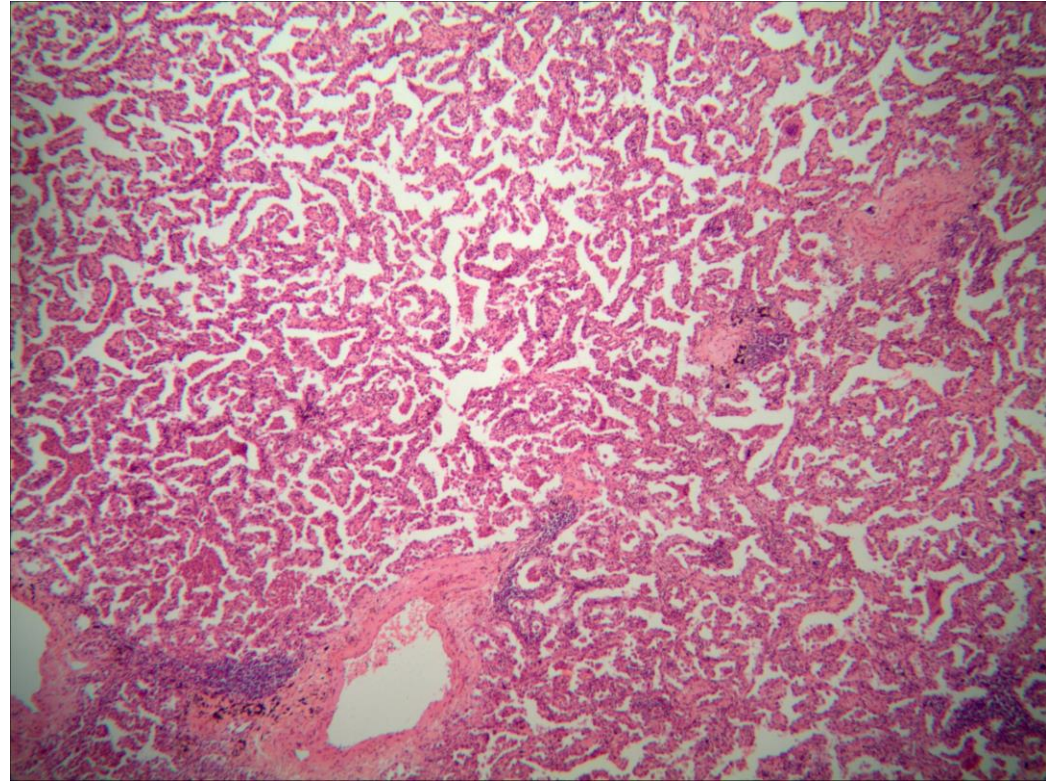

WL-2 CT (left) and IHC (right)

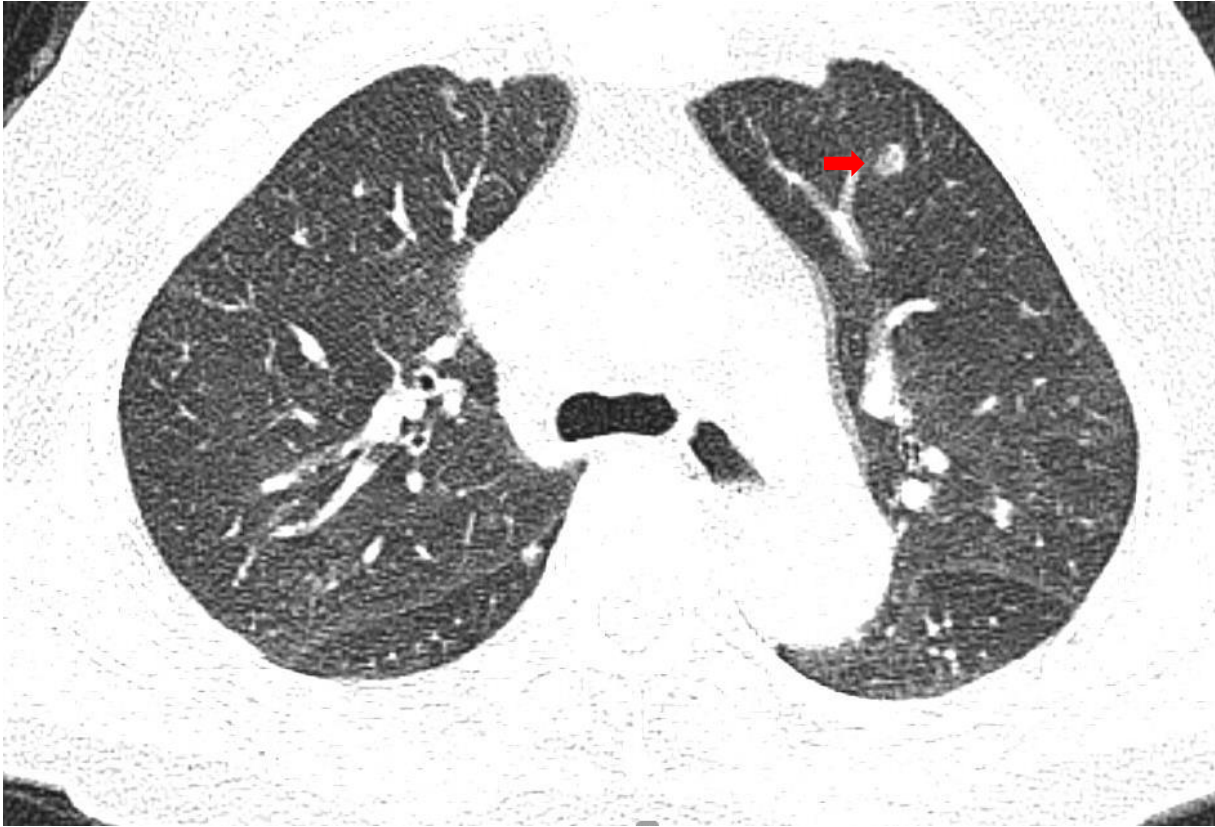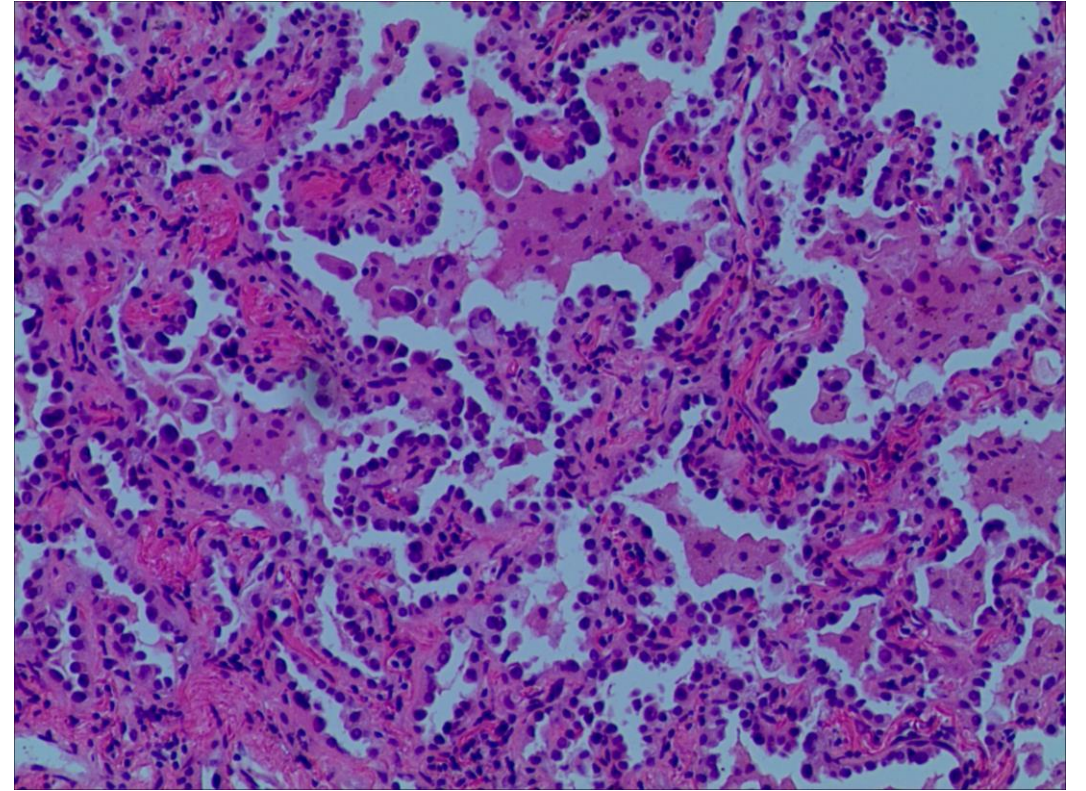

WL-3 CT (left) and IHC (right)

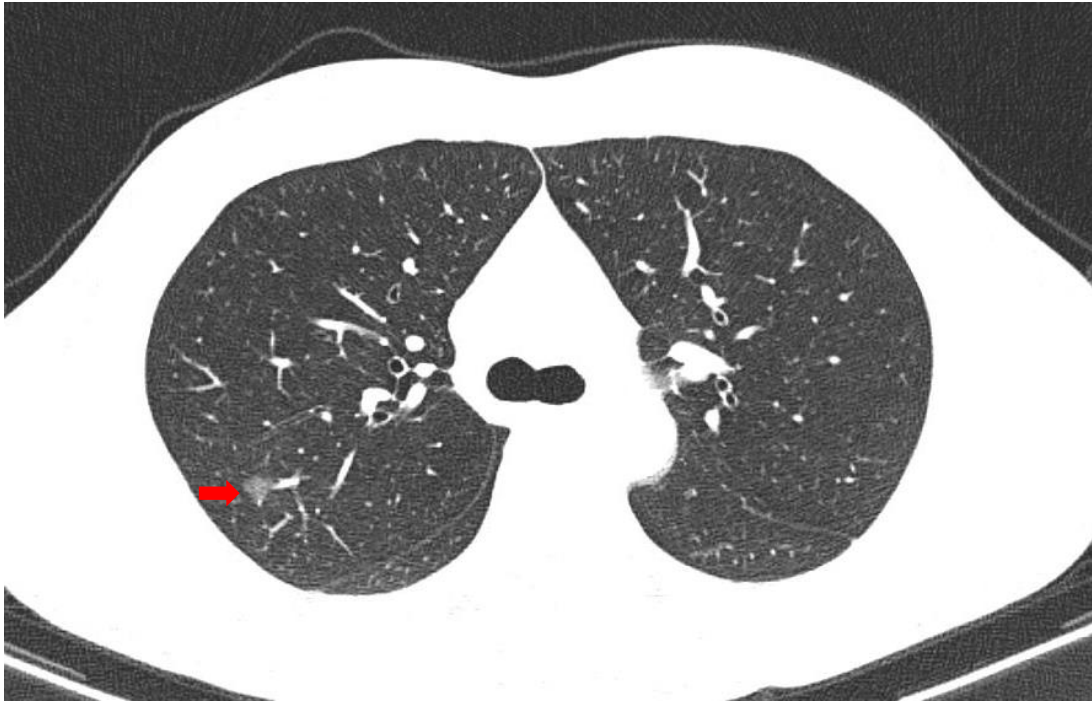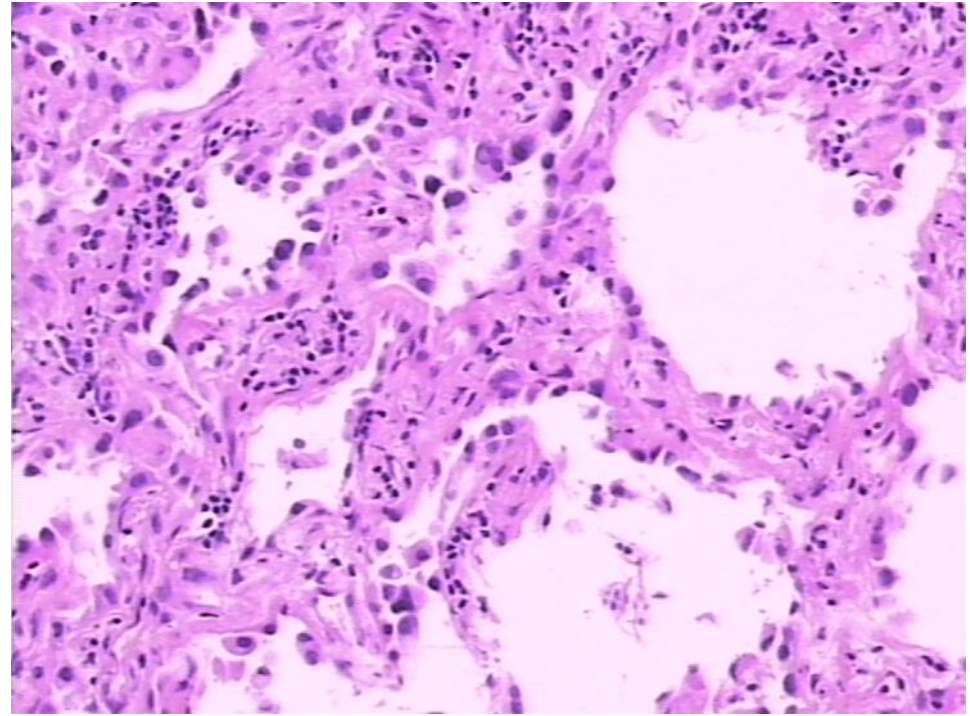

WL-4 CT (left) and IHC (right)

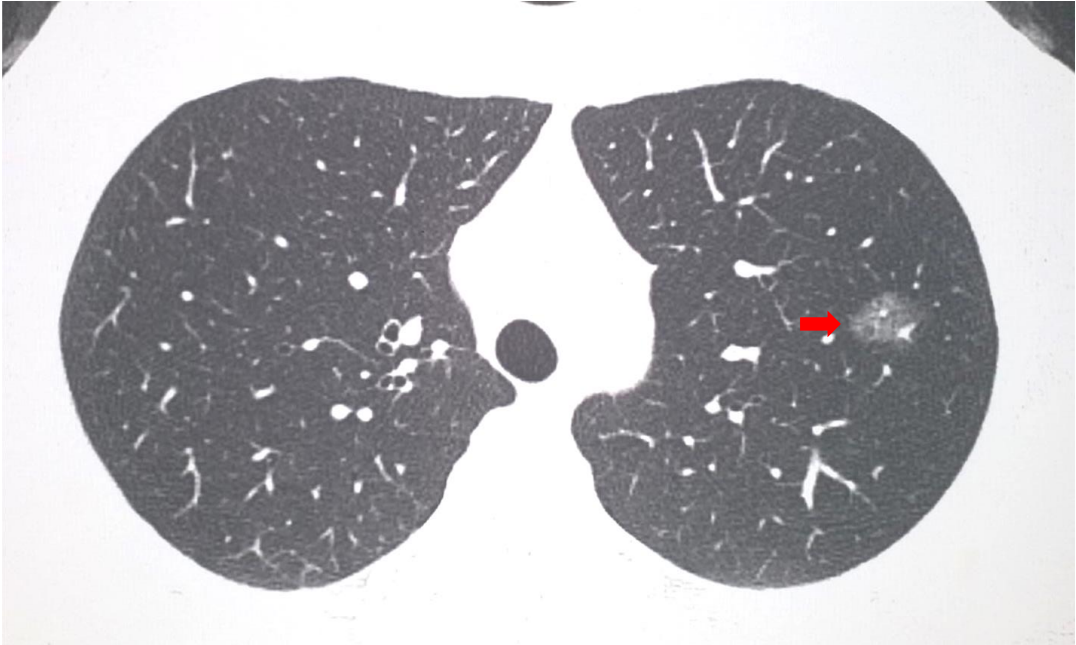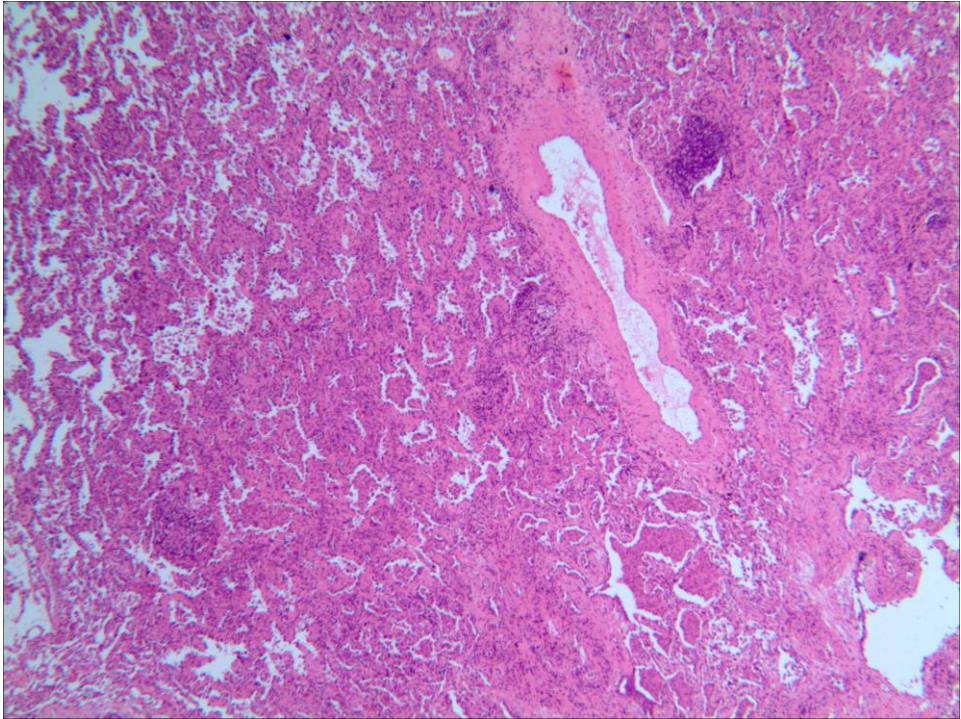

WL-5 CT (left) and IHC (right)

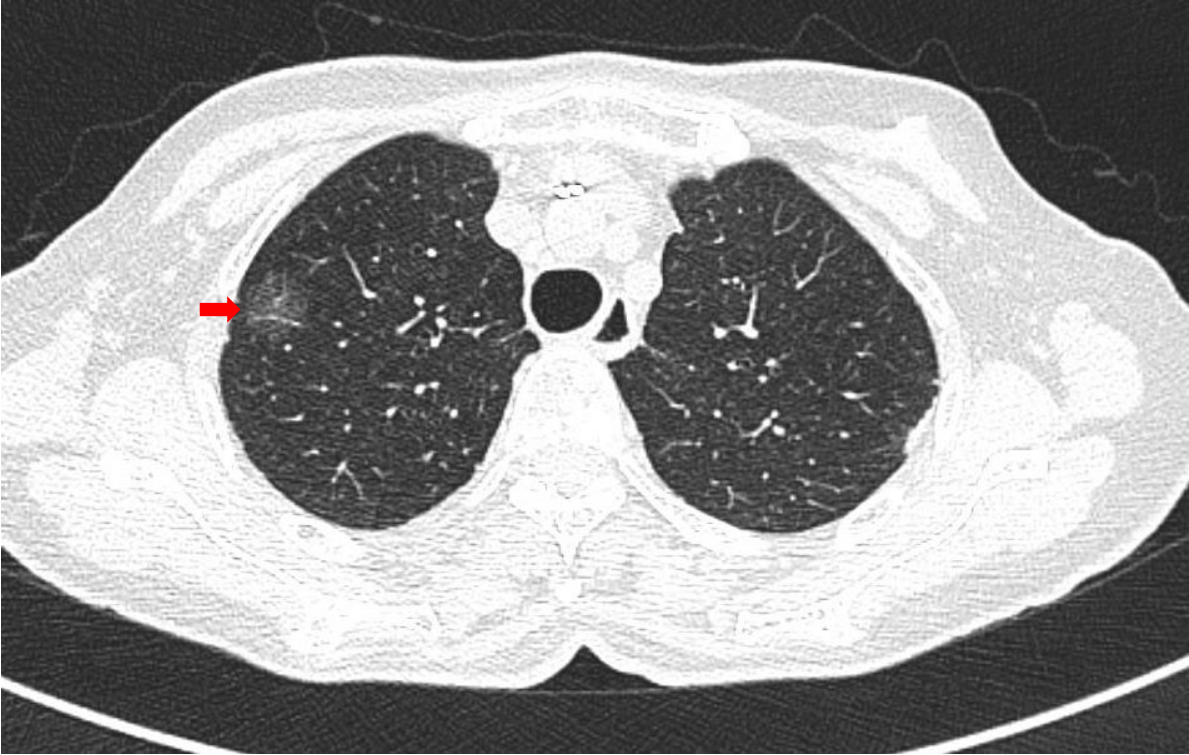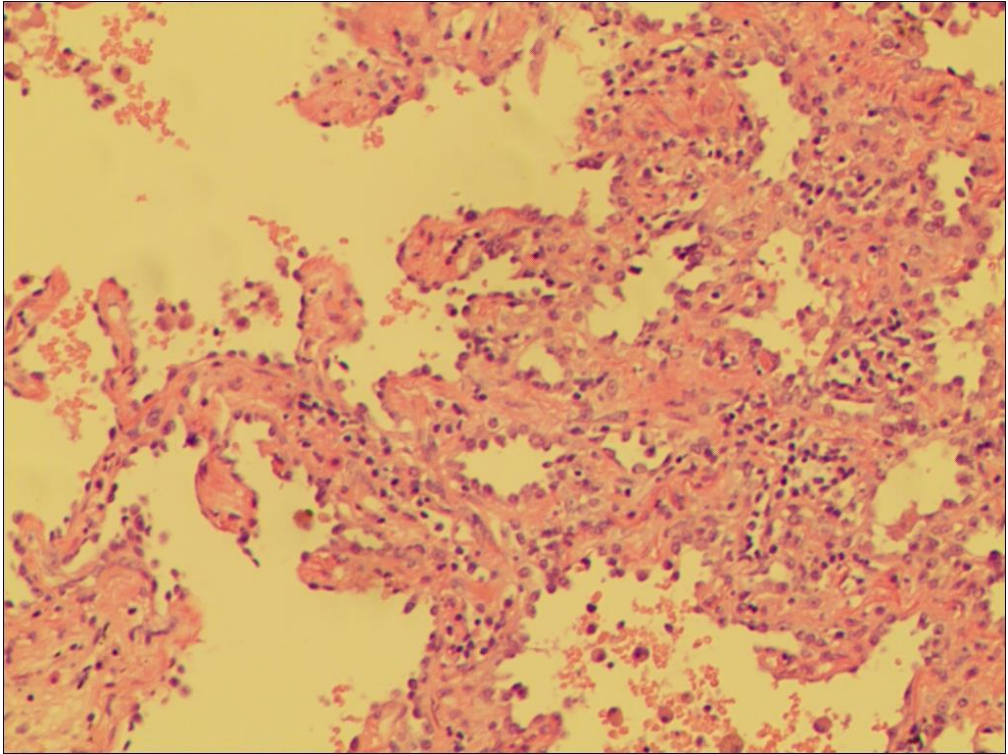

WL-6 CT (left) and IHC (right)

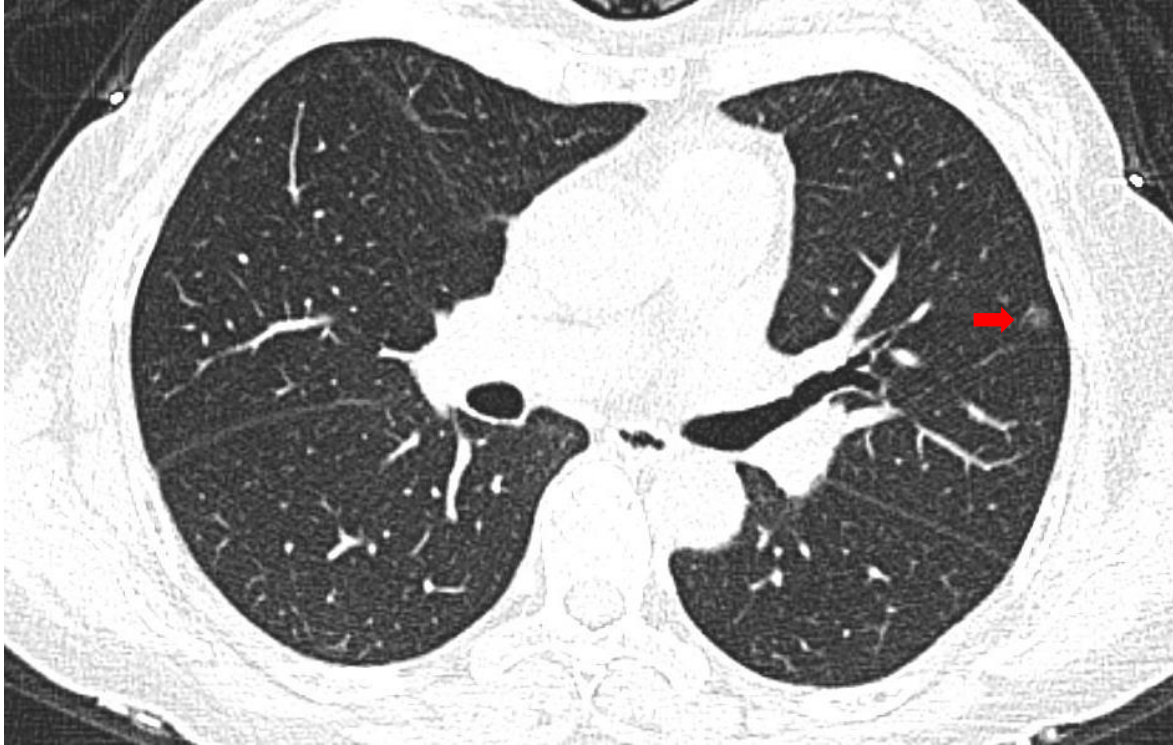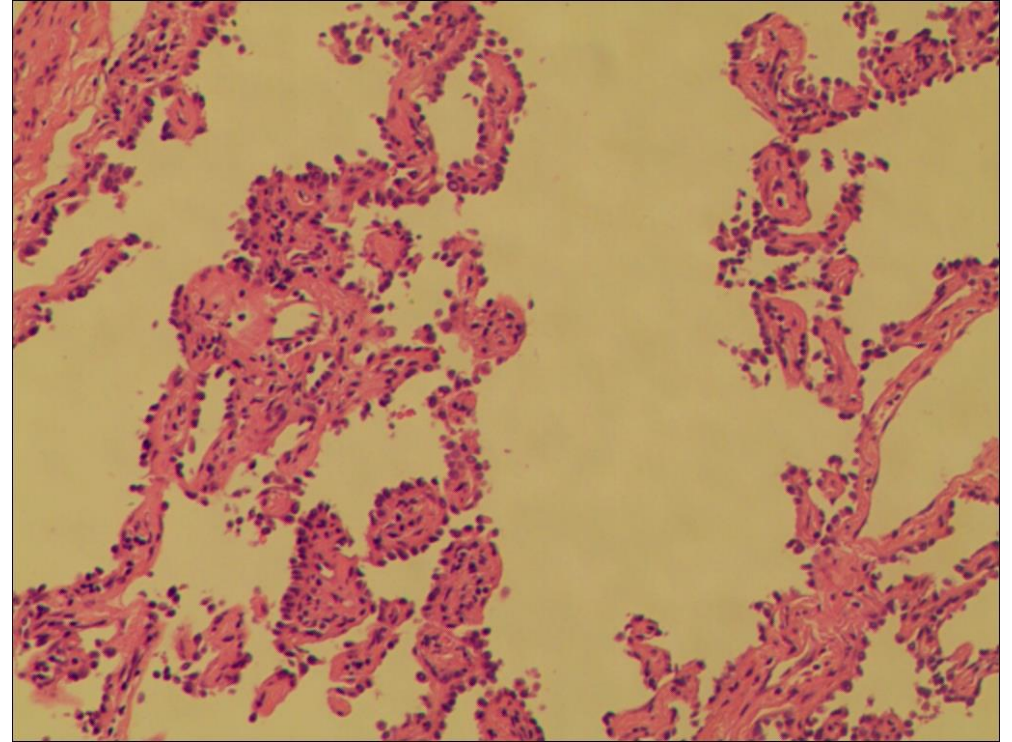



WL-7 CT (left) and IHC (right)

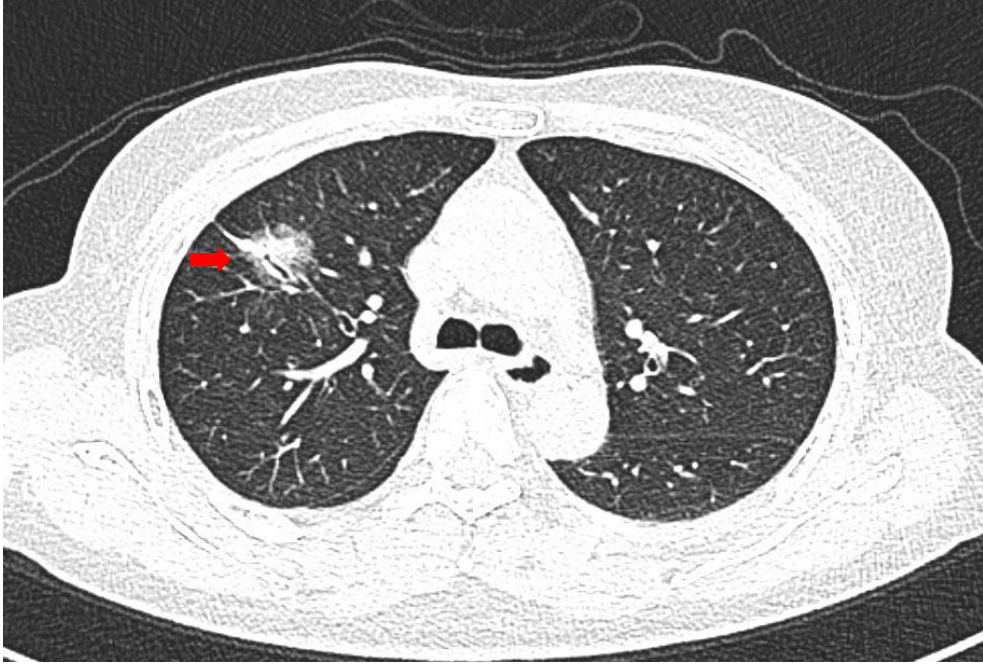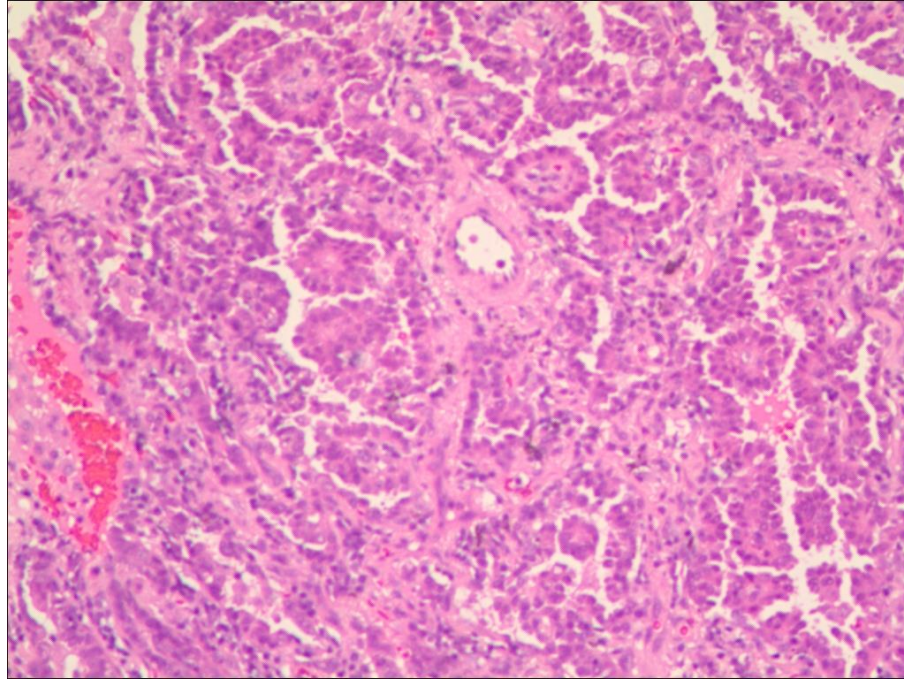

WL-8 CT (left) and IHC (right)

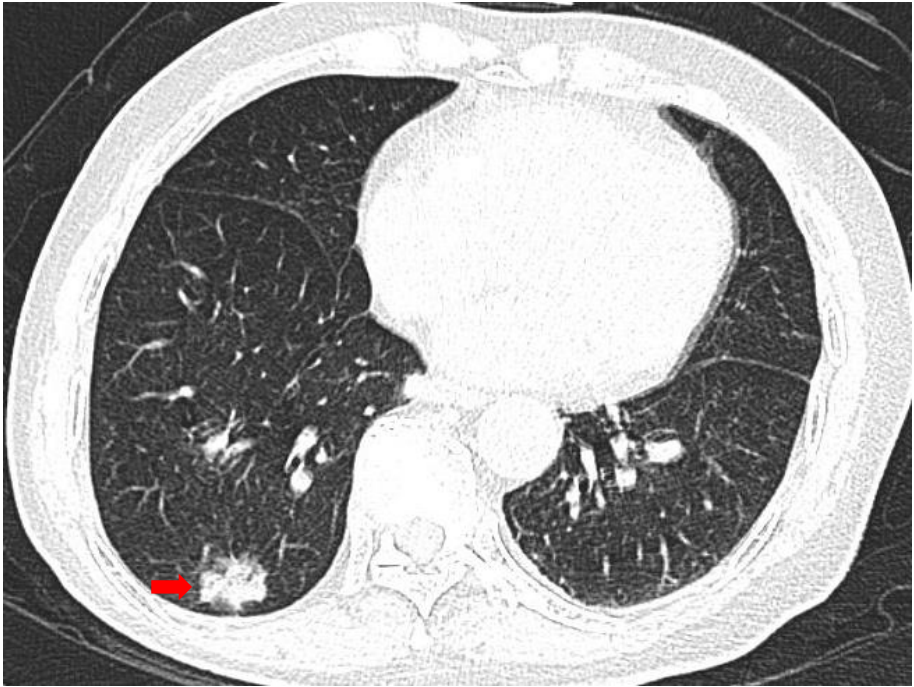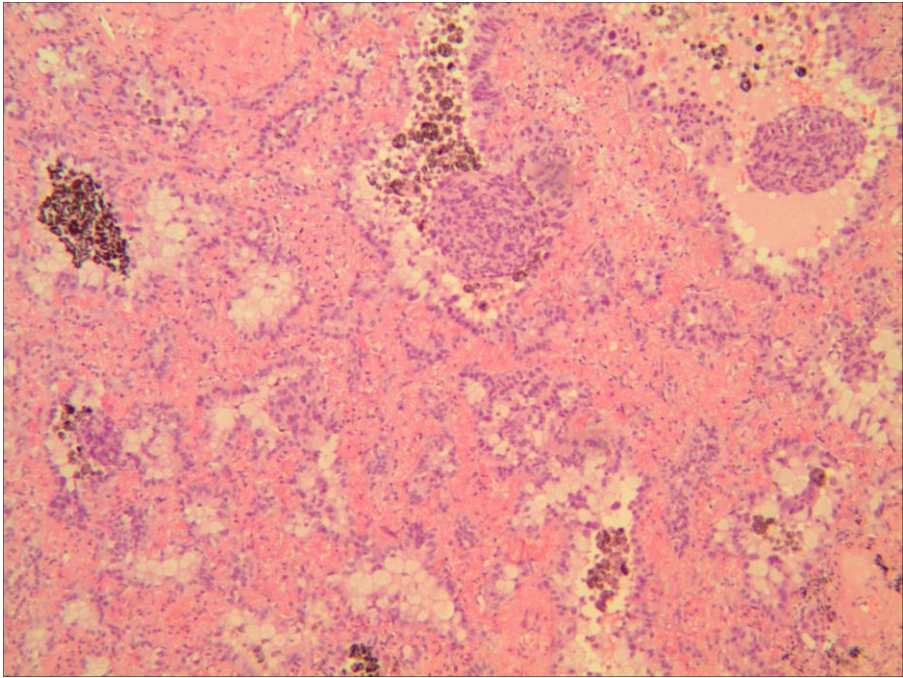

WL-9 CT (left) and IHC (right)

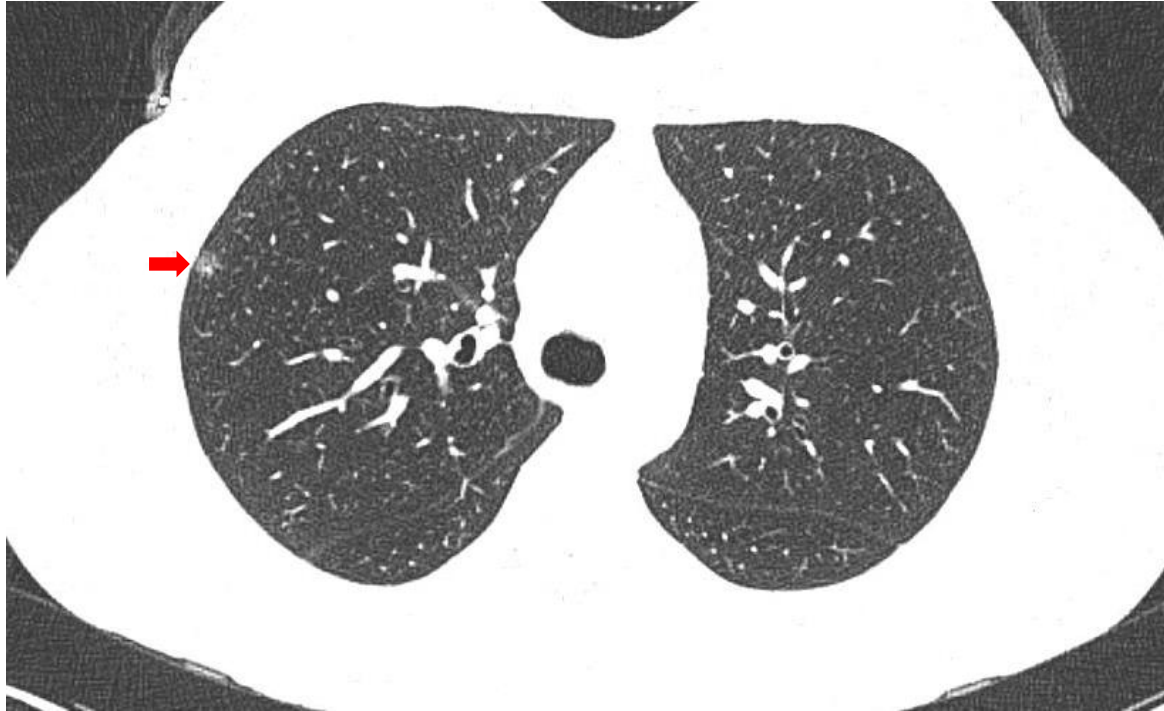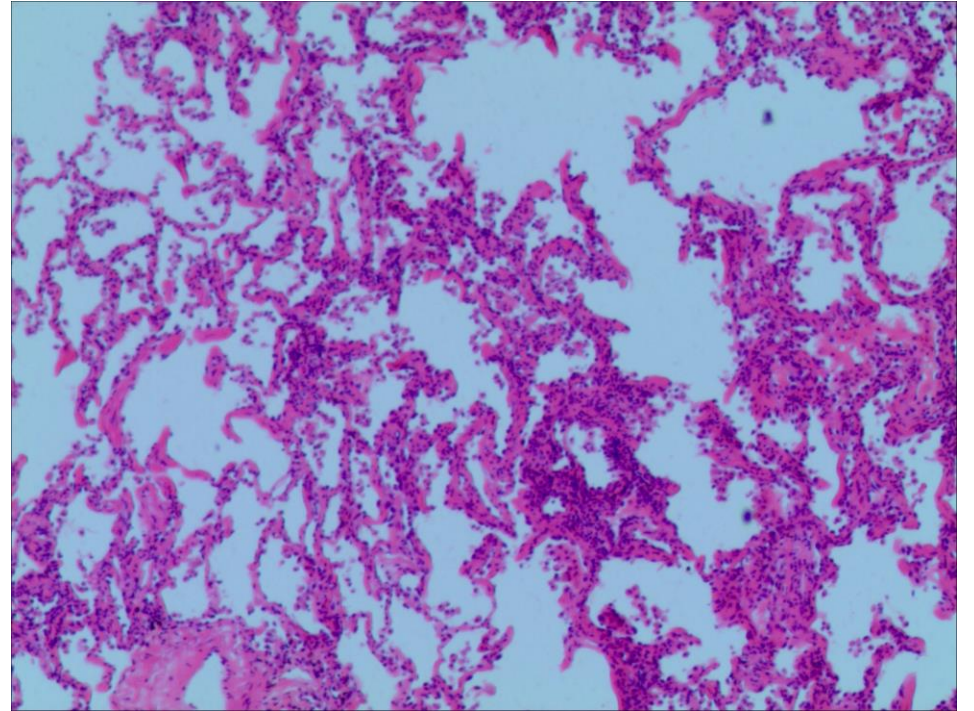

WL-10 CT (left) and IHC (right)

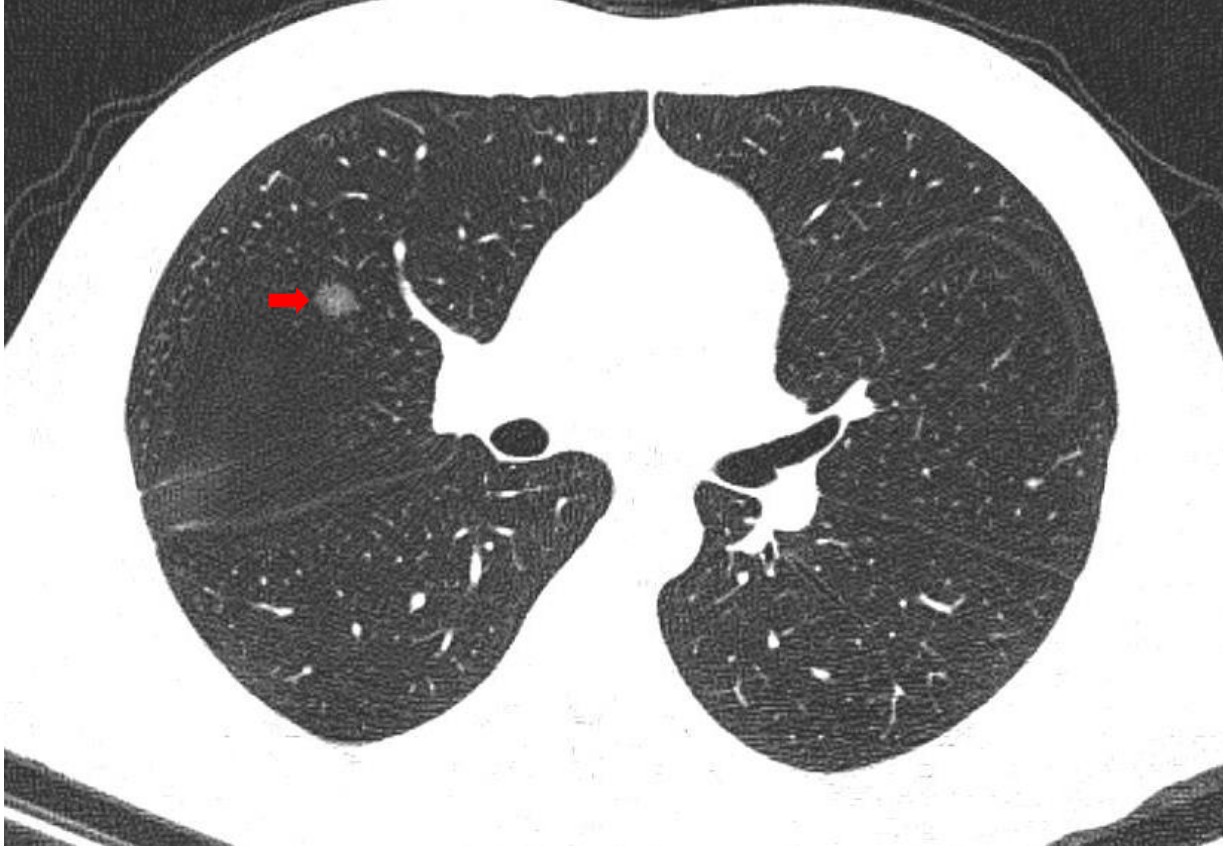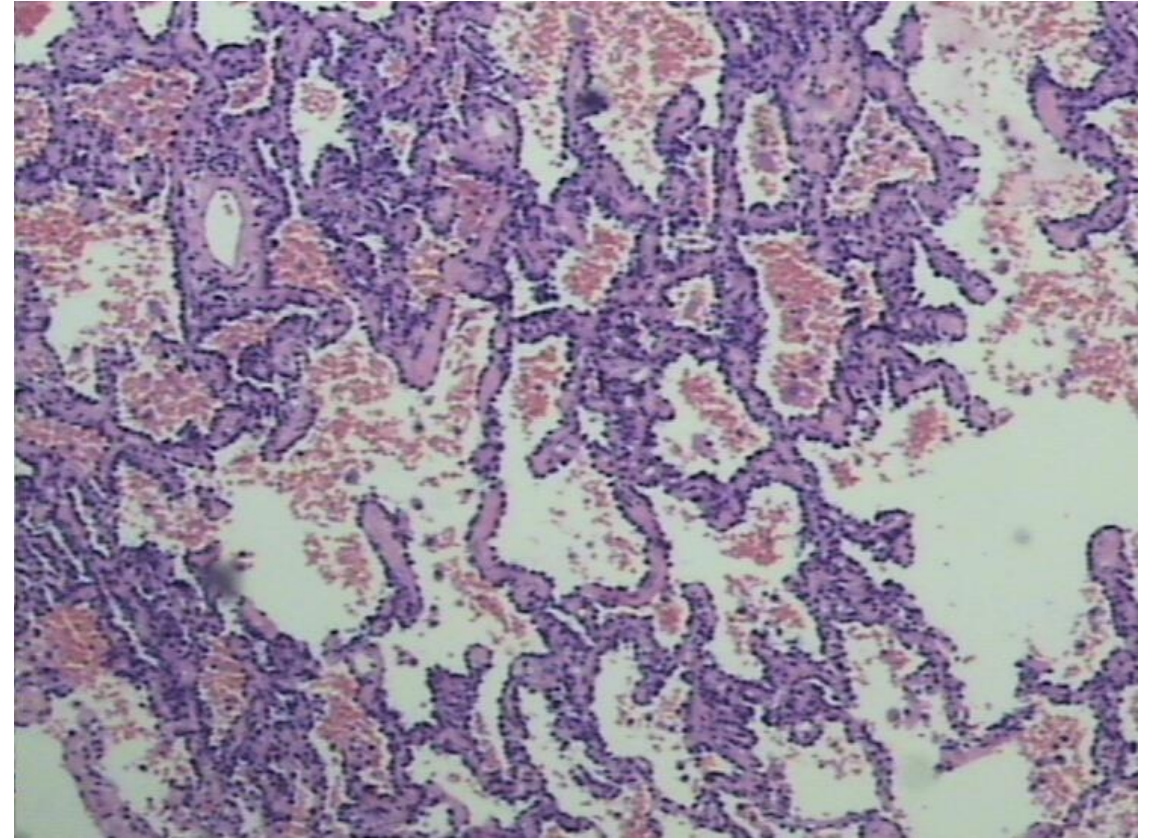

WL-11 CT (left) and IHC (right)

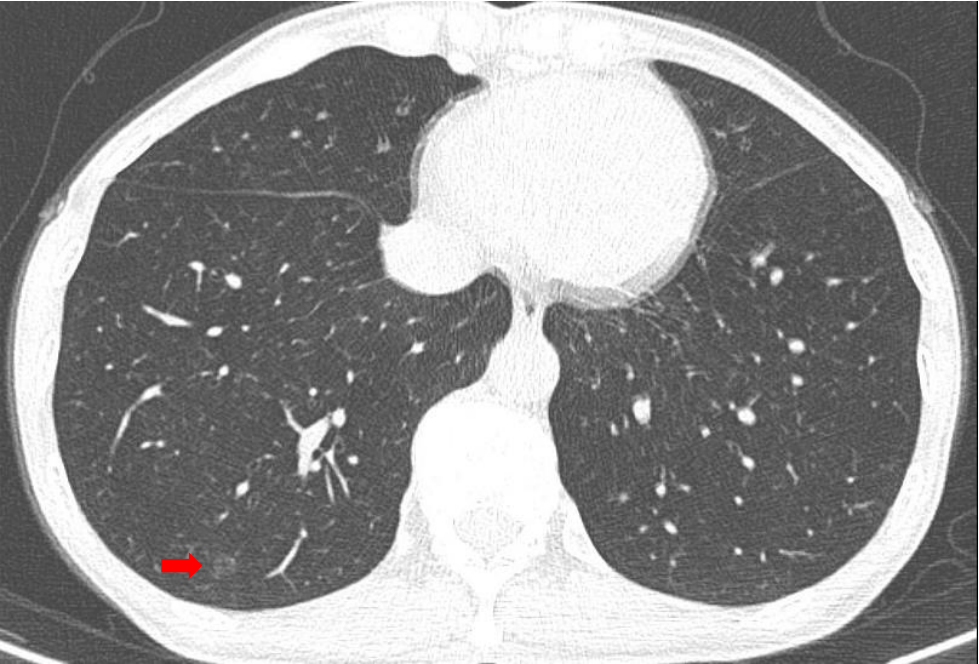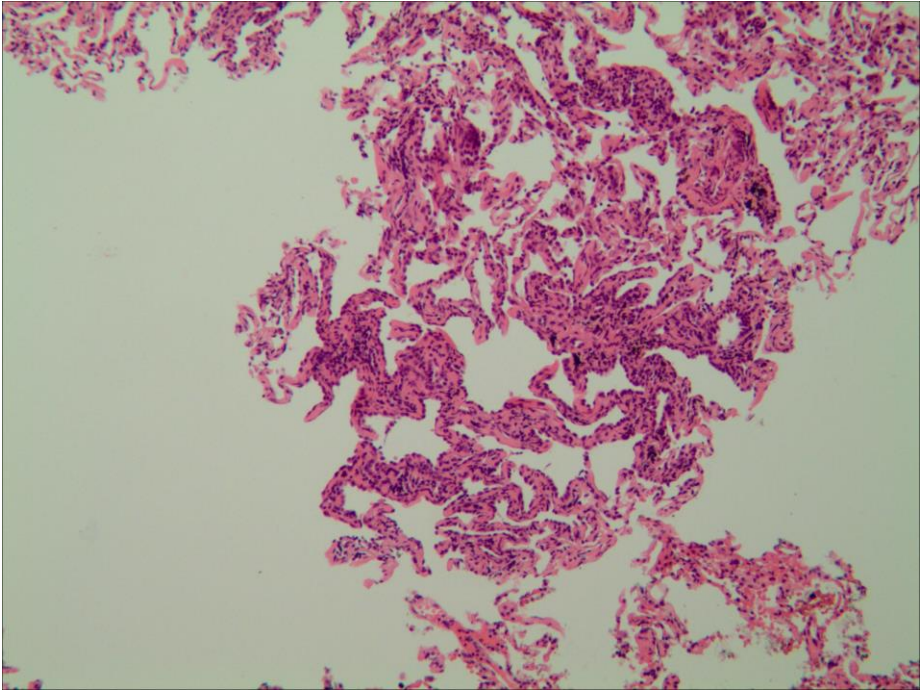

WL-12 CT (left) and IHC (right)

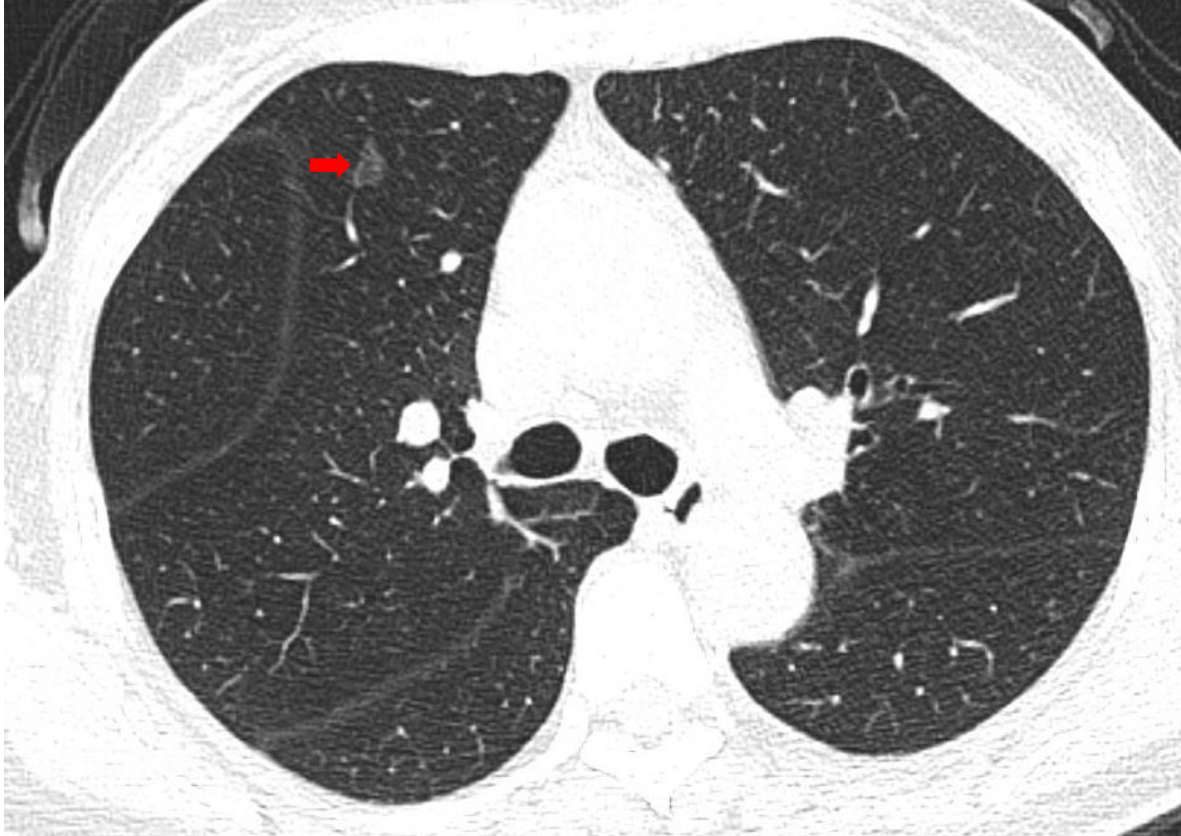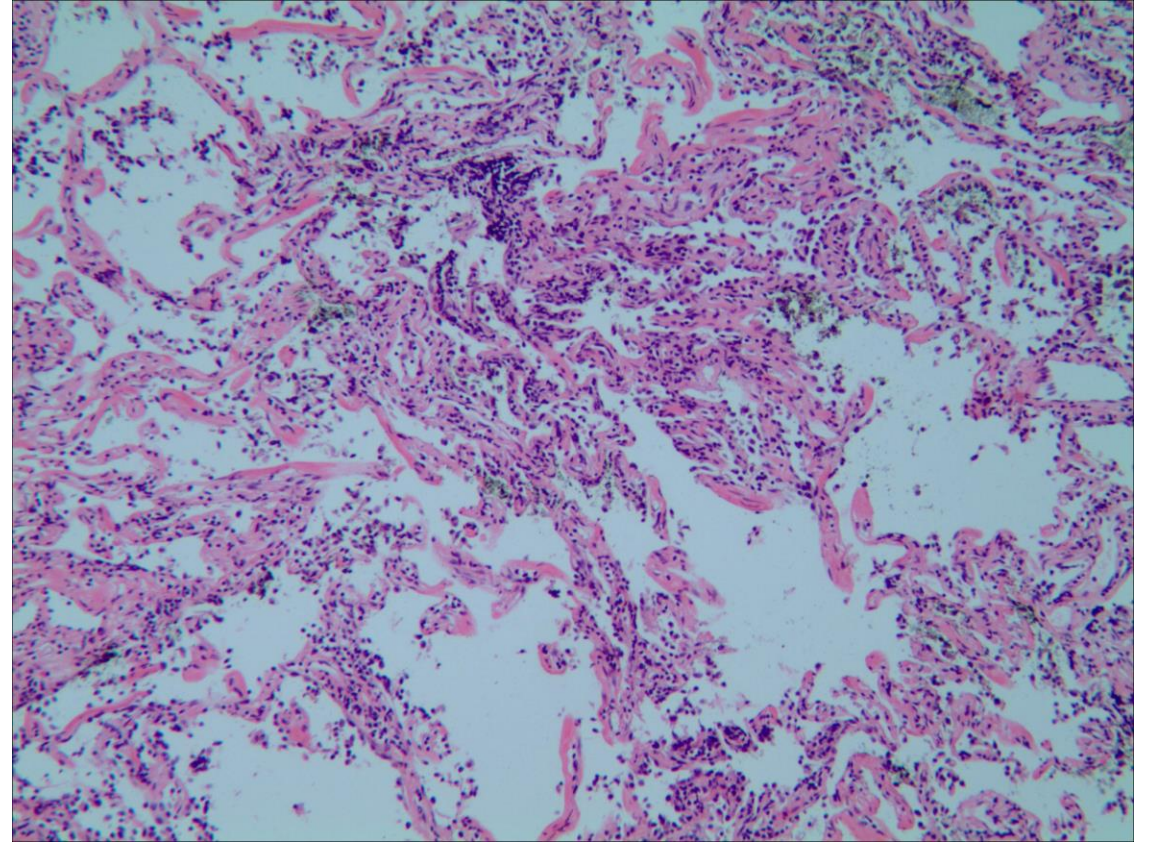

WL-13 CT (left) and IHC (right)

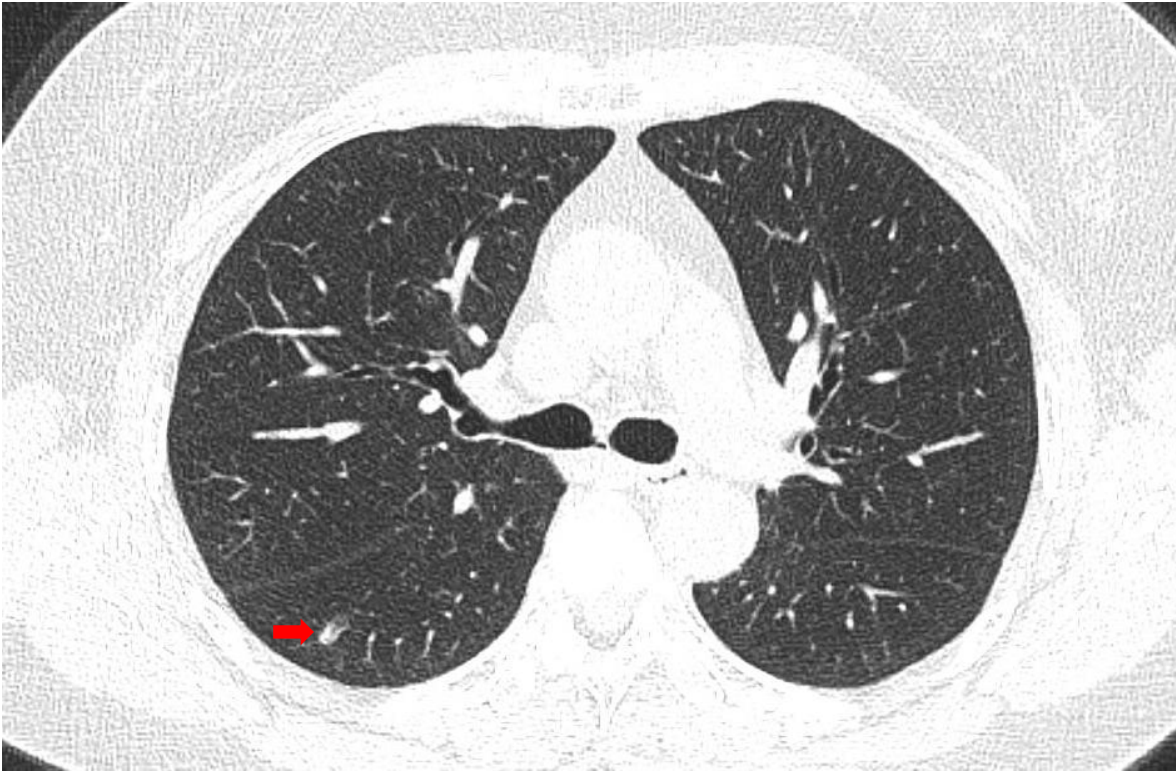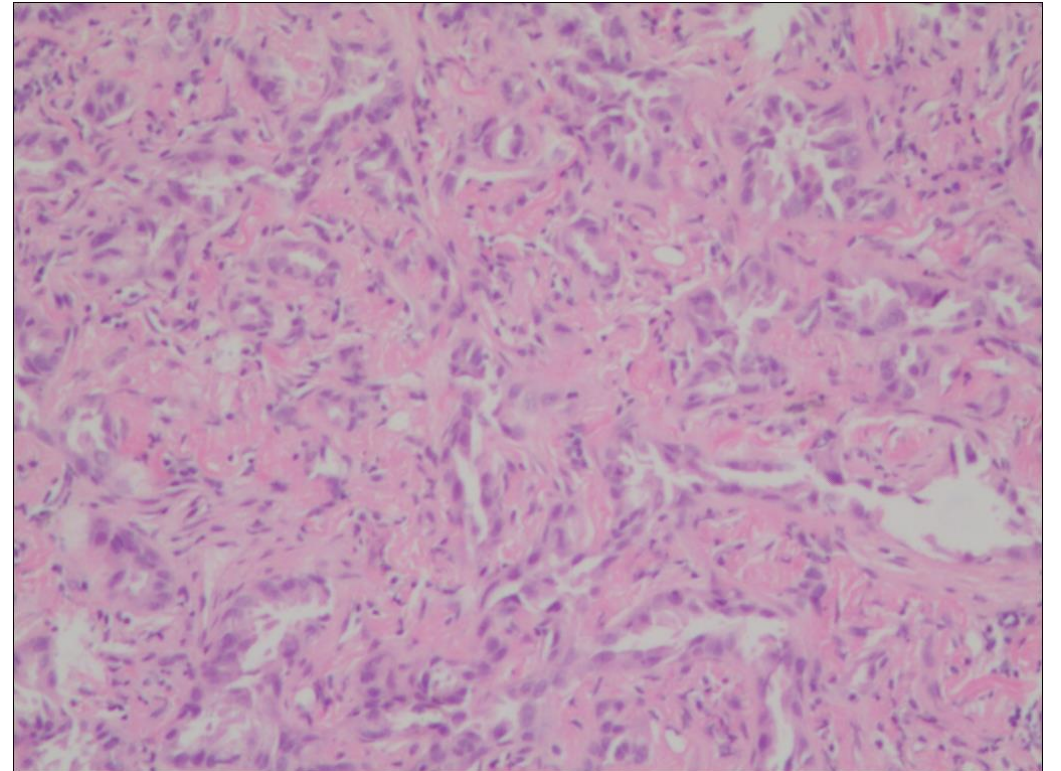

Supplement: Supplement_2.pdf [file Supplement_2.pdf]
