# Supplementary material for: Germline mutation analyses of malignant ground glass opacity nodules in non-smoking lung adenocarcinoma patients
Source: PeerJ. 2021 Aug 31;9:e12048. doi: 10.7717/peerj.12048 (PMC8415279; doi:10.7717/peerj.12048)
Supplement: Supplemental Information 3 [file peerj-09-12048-s003.xlsx]

## Sheet: BCAR1 KEGG pathway
#Term	ID	Background number	P-Value	Hyperlink
Bacterial invasion of epithelial cells	hsa05100	74	0.00133123	http://www.genome.jp/kegg-bin/show_pathway?hsa05100/hsa:9564%09red
Leukocyte transendothelial migration	hsa04670	112	0.00200572	http://www.genome.jp/kegg-bin/show_pathway?hsa04670/hsa:9564%09red
Yersinia infection	hsa05135	121	0.00216546	http://www.genome.jp/kegg-bin/show_pathway?hsa05135/hsa:9564%09red
Chemokine signaling pathway	hsa04062	190	0.00339019	http://www.genome.jp/kegg-bin/show_pathway?hsa04062/hsa:9564%09red
Focal adhesion	hsa04510	199	0.00354994	http://www.genome.jp/kegg-bin/show_pathway?hsa04510/hsa:9564%09red
Rap1 signaling pathway	hsa04015	210	0.00374519	http://www.genome.jp/kegg-bin/show_pathway?hsa04015/hsa:9564%09red
Regulation of actin cytoskeleton	hsa04810	214	0.00381618	http://www.genome.jp/kegg-bin/show_pathway?hsa04810/hsa:9564%09red
Human cytomegalovirus infection	hsa05163	225	0.00401143	http://www.genome.jp/kegg-bin/show_pathway?hsa05163/hsa:9564%09red

## Sheet: CACNA1A KEGG pathway
#Term	ID	Background number	P-Value	Hyperlink
Nicotine addiction	hsa05033	40	0.0010582	http://www.genome.jp/kegg-bin/show_pathway?hsa05033/hsa:773%09red
Type II diabetes mellitus	hsa04930	46	0.00121306	http://www.genome.jp/kegg-bin/show_pathway?hsa04930/hsa:773%09red
Long-term depression	hsa04730	60	0.0015744	http://www.genome.jp/kegg-bin/show_pathway?hsa04730/hsa:773%09red
Synaptic vesicle cycle	hsa04721	78	0.00203897	http://www.genome.jp/kegg-bin/show_pathway?hsa04721/hsa:773%09red
Taste transduction	hsa04742	83	0.00216802	http://www.genome.jp/kegg-bin/show_pathway?hsa04742/hsa:773%09red
GABAergic synapse	hsa04727	89	0.00232288	http://www.genome.jp/kegg-bin/show_pathway?hsa04727/hsa:773%09red
Morphine addiction	hsa05032	91	0.0023745	http://www.genome.jp/kegg-bin/show_pathway?hsa05032/hsa:773%09red
Cholinergic synapse	hsa04725	112	0.00291651	http://www.genome.jp/kegg-bin/show_pathway?hsa04725/hsa:773%09red
Glutamatergic synapse	hsa04724	114	0.00296812	http://www.genome.jp/kegg-bin/show_pathway?hsa04724/hsa:773%09red
Serotonergic synapse	hsa04726	115	0.00299393	http://www.genome.jp/kegg-bin/show_pathway?hsa04726/hsa:773%09red
Dopaminergic synapse	hsa04728	131	0.00340689	http://www.genome.jp/kegg-bin/show_pathway?hsa04728/hsa:773%09red
Retrograde endocannabinoid signaling	hsa04723	148	0.00384566	http://www.genome.jp/kegg-bin/show_pathway?hsa04723/hsa:773%09red
Calcium signaling pathway	hsa04020	193	0.0050071	http://www.genome.jp/kegg-bin/show_pathway?hsa04020/hsa:773%09red
MAPK signaling pathway	hsa04010	295	0.0076397	http://www.genome.jp/kegg-bin/show_pathway?hsa04010/hsa:773%09red

## Sheet: CYP21A2 KEGG pathway
#Term	ID	Background number	P-Value	Hyperlink
Steroid hormone biosynthesis	hsa00140	60	0.00108273	http://www.genome.jp/kegg-bin/show_pathway?hsa00140/hsa:1589%09red
Cortisol synthesis and secretion	hsa04927	65	0.00117148	http://www.genome.jp/kegg-bin/show_pathway?hsa04927/hsa:1589%09red
Aldosterone synthesis and secretion	hsa04925	98	0.00175722	http://www.genome.jp/kegg-bin/show_pathway?hsa04925/hsa:1589%09red
Cushing syndrome	hsa04934	155	0.00276895	http://www.genome.jp/kegg-bin/show_pathway?hsa04934/hsa:1589%09red
Metabolic pathways	hsa01100	1433	0.0254531	http://www.genome.jp/kegg-bin/show_pathway?hsa01100/hsa:1589%09red

## Sheet: FUS KEGG pathway
#Term	ID	Background number	P-Value	Hyperlink
Primary bile acid biosynthesis	hsa00120	17	0.000319494	http://www.genome.jp/kegg-bin/show_pathway?hsa00120/hsa:3295%09red
Biosynthesis of unsaturated fatty acids	hsa01040	27	0.000496991	http://www.genome.jp/kegg-bin/show_pathway?hsa01040/hsa:3295%09red
Fatty acid metabolism	hsa01212	57	0.00102948	http://www.genome.jp/kegg-bin/show_pathway?hsa01212/hsa:3295%09red
Peroxisome	hsa04146	83	0.00149097	http://www.genome.jp/kegg-bin/show_pathway?hsa04146/hsa:3295%09red
Metabolic pathways	hsa01100	1433	0.0254531	http://www.genome.jp/kegg-bin/show_pathway?hsa01100/hsa:3295%09red

## Sheet: HSD17B4 KEGG pathway
#Term	ID	Background number	P-Value	Hyperlink
Primary bile acid biosynthesis	hsa00120	17	0.000319494	http://www.genome.jp/kegg-bin/show_pathway?hsa00120/hsa:3295%09red
Biosynthesis of unsaturated fatty acids	hsa01040	27	0.000496991	http://www.genome.jp/kegg-bin/show_pathway?hsa01040/hsa:3295%09red
Fatty acid metabolism	hsa01212	57	0.00102948	http://www.genome.jp/kegg-bin/show_pathway?hsa01212/hsa:3295%09red
Peroxisome	hsa04146	83	0.00149097	http://www.genome.jp/kegg-bin/show_pathway?hsa04146/hsa:3295%09red
Metabolic pathways	hsa01100	1433	0.0254531	http://www.genome.jp/kegg-bin/show_pathway?hsa01100/hsa:3295%09red

## Sheet: LDLRAP1 KEGG pathway
#Term	ID	Background number	P-Value	Hyperlink
Cholesterol metabolism	hsa04979	50	0.000905234	http://www.genome.jp/kegg-bin/show_pathway?hsa04979/hsa:26119%09red
Endocytosis	hsa04144	244	0.00434867	http://www.genome.jp/kegg-bin/show_pathway?hsa04144/hsa:26119%09red

## Sheet: LMO2 KEGG pathway
#Term	Database	ID	Input number	Background number	P-Value	Corrected P-Value	Input	Hyperlink
Transcriptional misregulation in cancer	KEGG PATHWAY	hsa05202	1	186	0.00331919	0.00331919	LMO2	http://www.genome.jp/kegg-bin/show_pathway?hsa05202/hsa:4005%09red

## Sheet: MAX KEGG pathway
#Term	ID	Background number	P-Value	Hyperlink
Small cell lung cancer	hsa05222	93	0.00166847	http://www.genome.jp/kegg-bin/show_pathway?hsa05222/hsa:4149%09red
Transcriptional misregulation in cancer	hsa05202	186	0.00331919	http://www.genome.jp/kegg-bin/show_pathway?hsa05202/hsa:4149%09red
MAPK signaling pathway	hsa04010	295	0.00525391	http://www.genome.jp/kegg-bin/show_pathway?hsa04010/hsa:4149%09red
Pathways in cancer	hsa05200	530	0.00942509	http://www.genome.jp/kegg-bin/show_pathway?hsa05200/hsa:4149%09red

## Sheet: MTAP KEGG pathway
#Term	ID	Background number	P-Value	Hyperlink
Cysteine and methionine metabolism	hsa00270	49	0.000887485	http://www.genome.jp/kegg-bin/show_pathway?hsa00270/hsa:4507%09red
Metabolic pathways	hsa01100	1433	0.0254531	http://www.genome.jp/kegg-bin/show_pathway?hsa01100/hsa:4507%09red

## Sheet: Notch 3 KEGG pathway
#Term	ID	Background number	P-Value	Input	Hyperlink
Notch signaling pathway	hsa04330	48	0.000869735	NOTCH3	http://www.genome.jp/kegg-bin/show_pathway?hsa04330/hsa:4854%09red
Th1 and Th2 cell differentiation	hsa04658	92	0.00165072	NOTCH3	http://www.genome.jp/kegg-bin/show_pathway?hsa04658/hsa:4854%09red
Endocrine resistance	hsa01522	98	0.00175722	NOTCH3	http://www.genome.jp/kegg-bin/show_pathway?hsa01522/hsa:4854%09red
Thyroid hormone signaling pathway	hsa04919	119	0.00212996	NOTCH3	http://www.genome.jp/kegg-bin/show_pathway?hsa04919/hsa:4854%09red
Apelin signaling pathway	hsa04371	137	0.00244946	NOTCH3	http://www.genome.jp/kegg-bin/show_pathway?hsa04371/hsa:4854%09red
Breast cancer	hsa05224	147	0.00262695	NOTCH3	http://www.genome.jp/kegg-bin/show_pathway?hsa05224/hsa:4854%09red
MicroRNAs in cancer	hsa05206	299	0.00532491	NOTCH3	http://www.genome.jp/kegg-bin/show_pathway?hsa05206/hsa:4854%09red
Human papillomavirus infection	hsa05165	330	0.00587515	NOTCH3	http://www.genome.jp/kegg-bin/show_pathway?hsa05165/hsa:4854%09red
Pathways in cancer	hsa05200	530	0.00942509	NOTCH3	http://www.genome.jp/kegg-bin/show_pathway?hsa05200/hsa:4854%09red

[truncated: 7 more sheets: PARD3 KEGG pathway, PPOX KEGG pathway, RAD50 KEGG pathway, TTN KEGG pathway, AXAN1 KEGG pathway, TENM4 KEGG pathway, GJB2  KEGG pathwayNA]
