# Supplementary material for: Germline mutation analyses of malignant ground glass opacity nodules in non-smoking lung adenocarcinoma patients
Source: PeerJ. 2021 Aug 31;9:e12048. doi: 10.7717/peerj.12048 (PMC8415279; doi:10.7717/peerj.12048)
Supplement: Supplemental Information 4 — Raw data of clinical information of participants, including gender, age, smoking history, tumor size and location and pathological results. [file peerj-09-12048-s004.xls]

## Sheet: Sheet1
编号	M1	病灶	大小	年龄	性别	吸烟
WL-1	肺癌	右上肺微浸润性腺癌	12mm GGO	65	女	否
WL-2	肺癌	左上肺原位腺癌	6mmGGO	66	女	否
WL-3	肺癌	肺泡上皮非典型性腺瘤性增生	右上肺5mm	70	女	否
WL-4	肺癌	左上肺浸润性腺癌	15mmGGO	48	女	否
WL-5	肺癌	右上肺微浸润性腺癌	10mmGGO	79	女	否
WL-6	肺癌	左上肺微浸润性腺癌	6mmGGO	56	女	否
WL-7	肺癌	右上肺浸润性腺癌	20mmGGO	65	女	否
WL-8	肺癌	右下肺细支气管肺泡癌	20mmGGO	70	男	否
WL-9	肺癌	右上肺原位腺癌	8mmGGO	55	女	否
WL-10	肺癌	右上肺原位非粘液性腺癌	7mmGGO	63	男	否
WL-11	肺癌	右下肺原位腺癌	6mmGGO	53	女	否
WL-12	肺癌	右上肺原位腺癌	8mmGGO	56	女	否
WL-13	肺癌	右下肺背段微浸润性腺癌	7mmGGO	54	女	否
