# Supplementary material for: Germline mutation analyses of malignant ground glass opacity nodules in non-smoking lung adenocarcinoma patients
Source: PeerJ. 2021 Aug 31;9:e12048. doi: 10.7717/peerj.12048 (PMC8415279; doi:10.7717/peerj.12048)
Supplement: Supplemental Information 5 [file peerj-09-12048-s005.xlsx]

## Sheet: Sheet1
ID	Tumor	Tumor location and pathology	Tumour size	Age	Gender	Smoking history
WL-1	Lung cancer	right upper lobe, minimally invasive adenocarcinoma	12mm GGO	65	F	No
WL-2	Lung cancer	left upper lobe, adenocarcinoma in situ	6mm GGO	66	F	No
WL-3	Lung cancer	right upper lobe, Atypical adenomatous hyperplasia	5mm GGO	70	F	No
WL-4	Lung cancer	left upper lobe, invasive	15mm GGO	48	F	No
WL-5	Lung cancer	right upper lobe, minimally invasive adenocarcinoma	10mm GGO	79	F	No
WL-6	Lung cancer	left upper lobe, minimally invasive adenocarcinoma	6mm GGO	56	F	No
WL-7	Lung cancer	right upper lobe, invasive	20mm GGO	65	F	No
WL-8	Lung cancer	right lower lobe, invasive	20mm GGO	70	M	No
WL-9	Lung cancer	right upper lobe, adenocarcinoma in situ	8mm GGO	55	F	No
WL-10	Lung cancer	right upper lobe, adenocarcinoma in situ	7mm GGO	63	M	No
WL-11	Lung cancer	right lower lobe, adenocarcinoma in situ	6mm GGO	53	F	No
WL-12	Lung cancer	right upper lobe, adenocarcinoma in situ	8mm GGO	56	F	No
WL-13	Lung cancer	right lower lobe, minimally invasive adenocarcinoma	7mm GGO	54	F	No
